# Supplementary material for: EDTMP ligand-enhanced water interactions endowing iron oxide nanoparticles with dual-modal MRI contrast ability
Source: Royal Society of Chemistry journal article supplement (doi:10.1039/d1tb01677f), 2021-01-01
Supplement: d1tb01677f1.pdf [file d1tb01677f1.pdf]

## Supplementary Information

### **EDTMP ligand-enhanced water interaction endowing iron oxide nanoparticles with dual-modal MRI contrast ability**

*Lili Hao<sup>a,b</sup>, Peng Wang<sup>a,b</sup>, Zhenxu Wu<sup>a</sup>, Zongliang Wang<sup>a</sup>, Yu Wang<sup>a</sup>, Yongzhan Zhu<sup>c</sup>, Zhiqiang Xu<sup>c</sup>, Min Guo<sup>a,\*</sup>, Jiansong Ji<sup>d</sup>, Peibiao Zhang<sup>a,b,\*</sup>*

<sup>a</sup> Key Laboratory of Polymer Ecomaterials, Changchun Institute of Applied Chemistry, Chinese Academy of Sciences, 5625 Renmin Street, Changchun 130022, P. R. China.

<sup>b</sup> School of Applied Chemistry and Engineering, University of Science and Technology of China, 96 Jinzhai Road, Hefei 230026, P. R. China.

<sup>c</sup> 8th Department of Orthopaedics, Foshan Hospital of Traditional Chinese Medicine, Foshan 528000, P. R. China.

<sup>d</sup> Key Laboratory of Imaging Diagnosis and Minimally Invasive Intervention Research, Lishui Hospital of Zhejiang University, Lishui 323000, P. R. China.

\* Corresponding author: Peibiao Zhang, Min Guo

E-mail address: zhangpb@ciac.ac.cn (P. Zhang), guomin@ciac.ac.cn (M. Guo)

Tel.: +86-431-85262058;

Fax: +86-431-85262058.

## **Experimental details**

### **Bioactivity assay**

The bioactivity of as-synthesized samples was determined by Alkaline phosphatase (ALP) activity assay based on the manufacturer's instructions.<sup>[1]</sup> Alkaline phosphatase (ALP) staining was applied to qualitatively assess the activity of ALP in MC3T3-E1 cells exposed to nanoparticles.  $2 \times 10^4$  cells were firstly seeded into each well of the 24-well plate and incubated with DMEM for 24 h. Then, the original medium was substituted with fresh medium containing nanoparticles at the concentration of 100  $\mu\text{g/mL}$ , and the cells were exposed to magnetic nanoparticles for other 24 h. Finally, the medium containing samples was replaced by fresh normal culture medium. When cultured for 7 days, the cells were washed three times with PBS, fixed with 4% paraformaldehyde (PFA) for 15 min, and washed with PBS again. Thereafter, the cells were immersed in 500  $\mu\text{L}$  ALP dye for at least 12 h at room temperature under dark conditions. The extra ALP dye was washed away with PBS and then the purple color intensity was observed by a light microscope (TE2000U, Nikon). The ALP relative activity was tested by Alkaline phosphatase detection kit (Beyotime Biotechnology, Inc). After treated with nanoparticles for 7 days, MC3T3-E1 cells were washed with PBS for three times and split by adding 200  $\mu\text{L}$  of RIPA cell lysis solution, freezing at  $-80^\circ\text{C}$  for 25 min and thawing at  $37^\circ\text{C}$ . Then, p-nitrophenol phosphate substrate and BCA solution were added, followed by incubation in the dark for 30 min at  $37^\circ\text{C}$ . The absorbances at 405 nm ( $\text{OD}_{405}$ ) and 562 nm ( $\text{OD}_{562}$ ) were read using a multifunction microplate scanner. The corresponding ALP quantitative evaluation was calculated according to the equation  $\text{OD}_{405}/\text{OD}_{562}$ . The cells incubated with normal culture medium was employed as control group (TCP).

### **Serum analysis and histological evaluation**

After MRI scanning, mice were anesthetized by chloral hydrate and the blood samples were collected for biochemical analysis. The Fe concentration in rat blood was measured using inductively coupled plasma-optical emission spectroscopy (ICP-OES,

Thermo Jarrell Ash, USA). Then, the liver, kidney and spleen were dissected and fixed in 4% PFA for histological evaluation. The fixed tissues were embedded in paraffin to cut into sections. After gradient dehydration, tissue sections were stained with hematoxylin and eosin and Prussian Blue Iron Stain Kit. Finally, tissue compatibility was observed by a digital slice scanner (Pannoramic DESK, P-MIDI, P250, 3D HISTECH, Hungary). Normal mice were used as control.

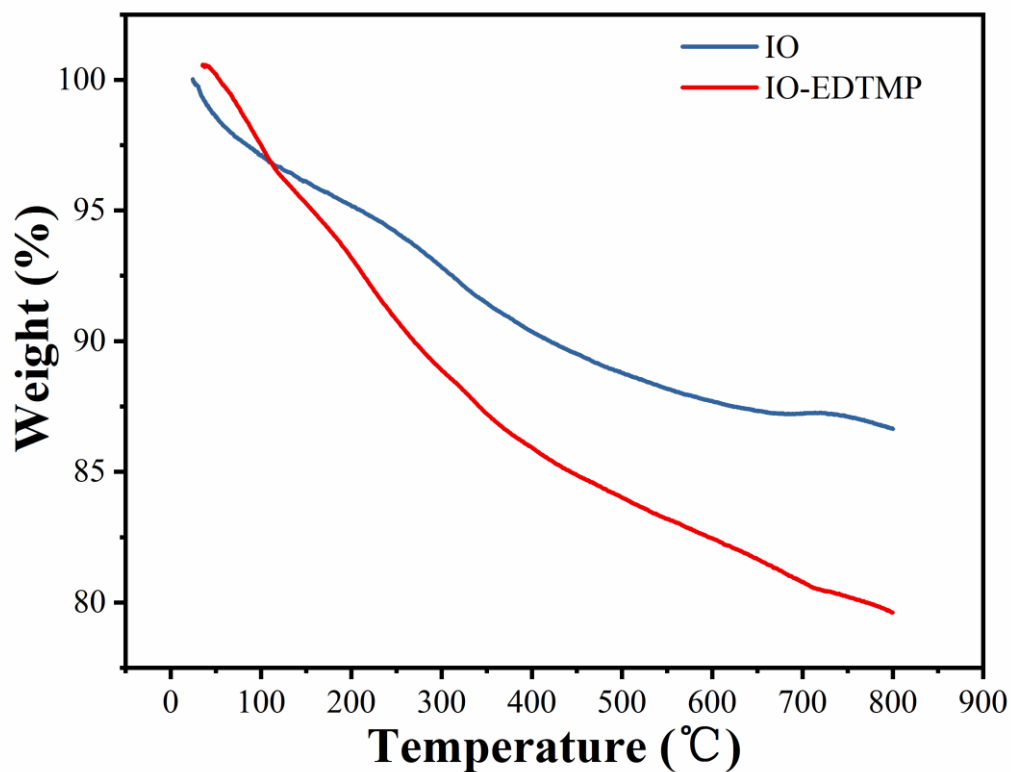

Figure S1. TGA curves of IO and IO-EDTMP NPs.

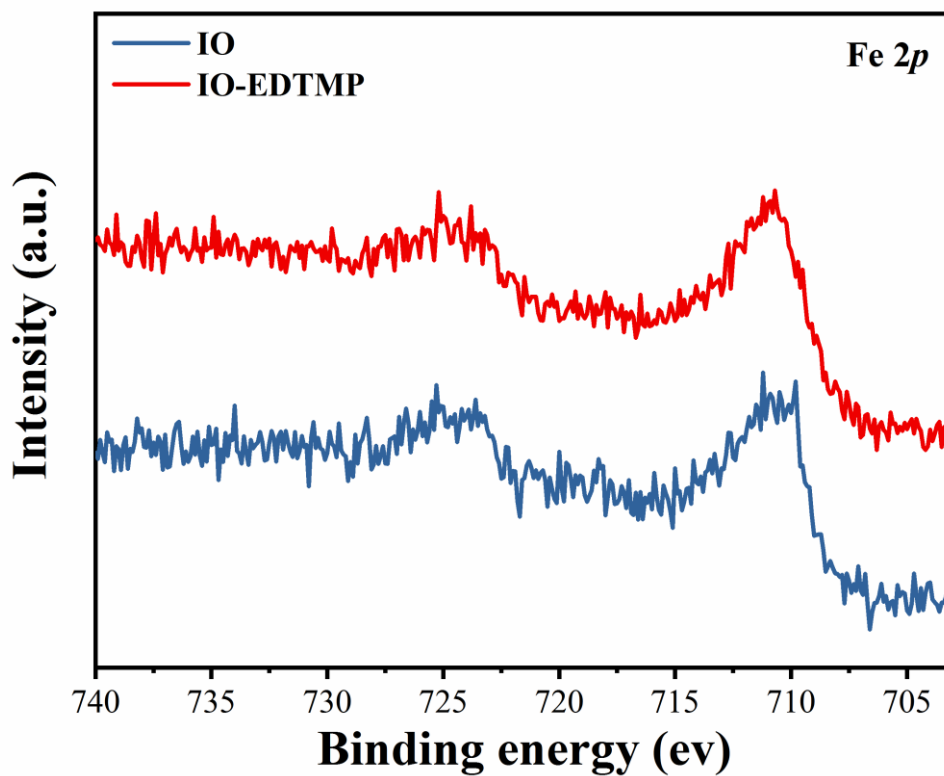

Figure S2. High-resolution Fe 2p XPS spectra of IO and IO-EDTMP NPs.

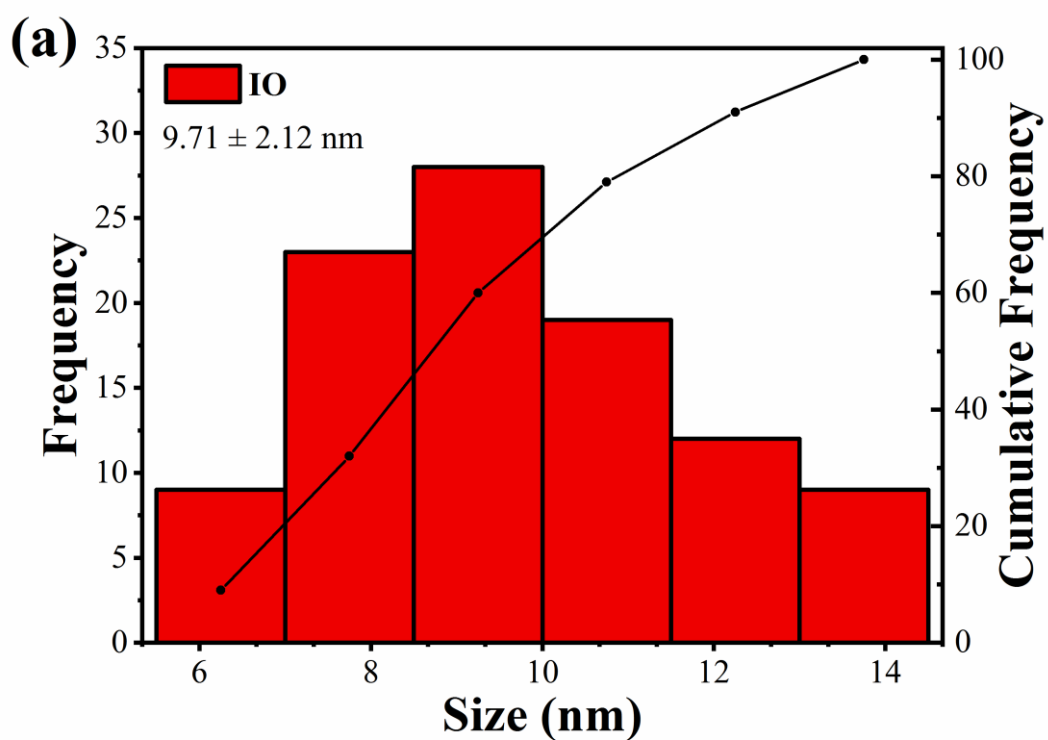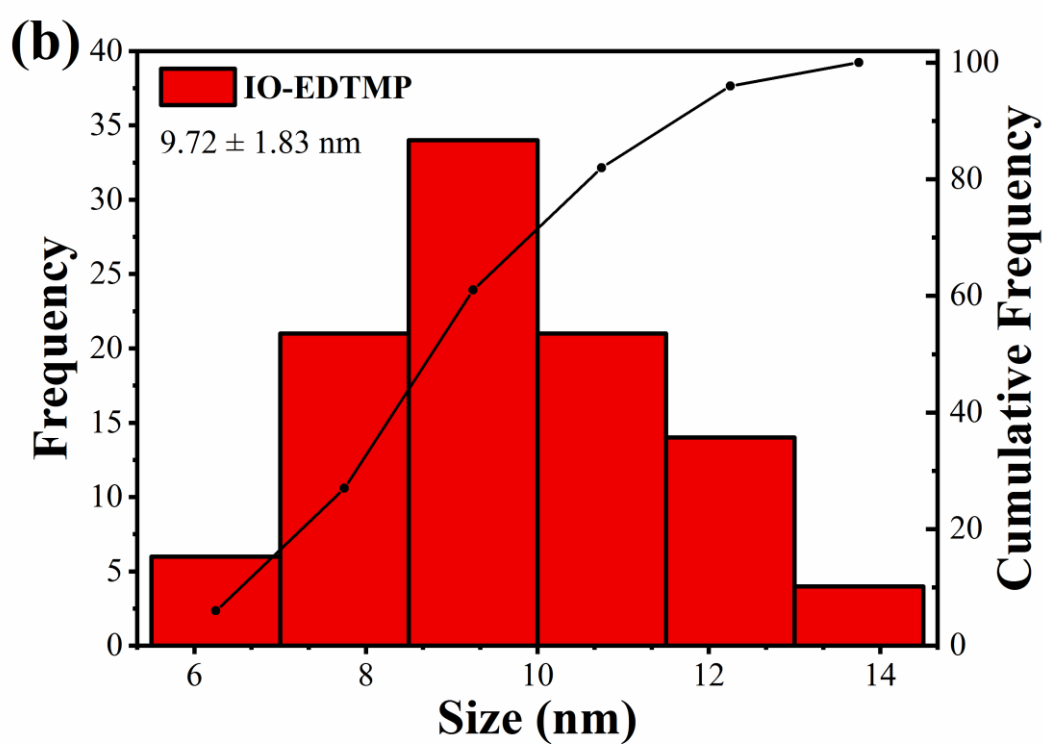

**Figure S3.** Statistical analysis of size distribution of (a) IO NPs and (b) IO-EDTMP NPs measured from TEM images.

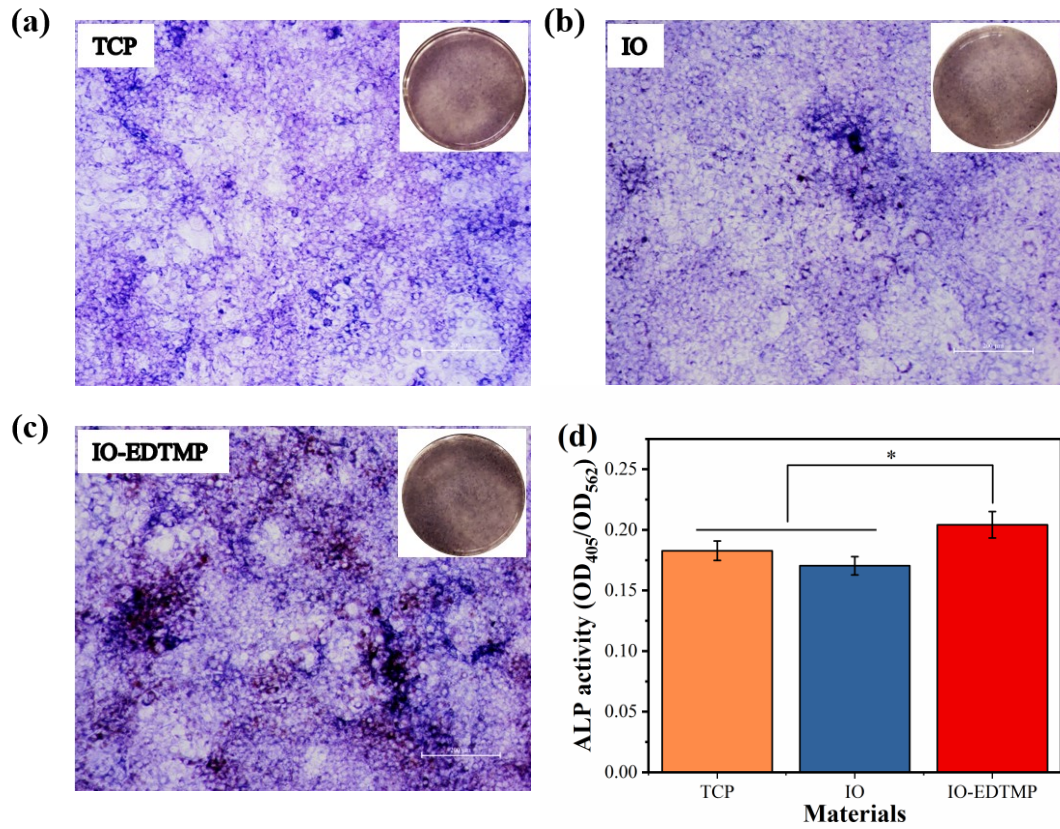

**Figure S4.** (a-c) ALP staining and (d) the corresponding quantitative evaluation of cells treated with different materials for 7 days. Scale bar: 200  $\mu\text{m}$ . \* indicates a statistically significant difference,  $*p < 0.05$ .

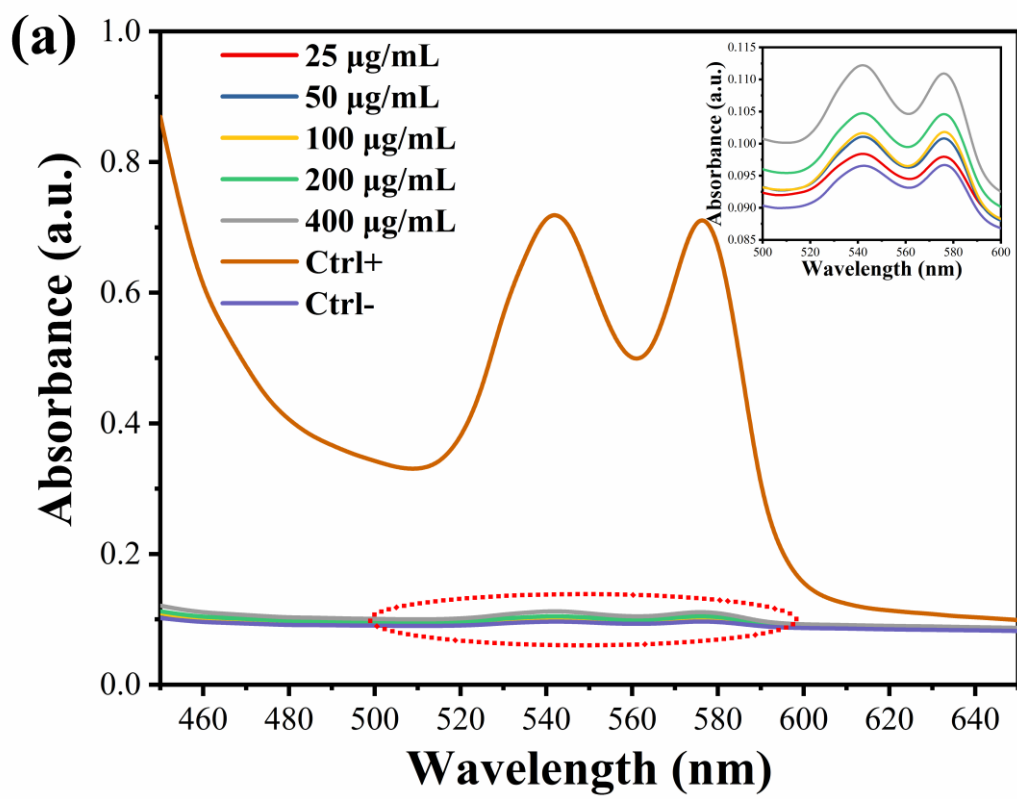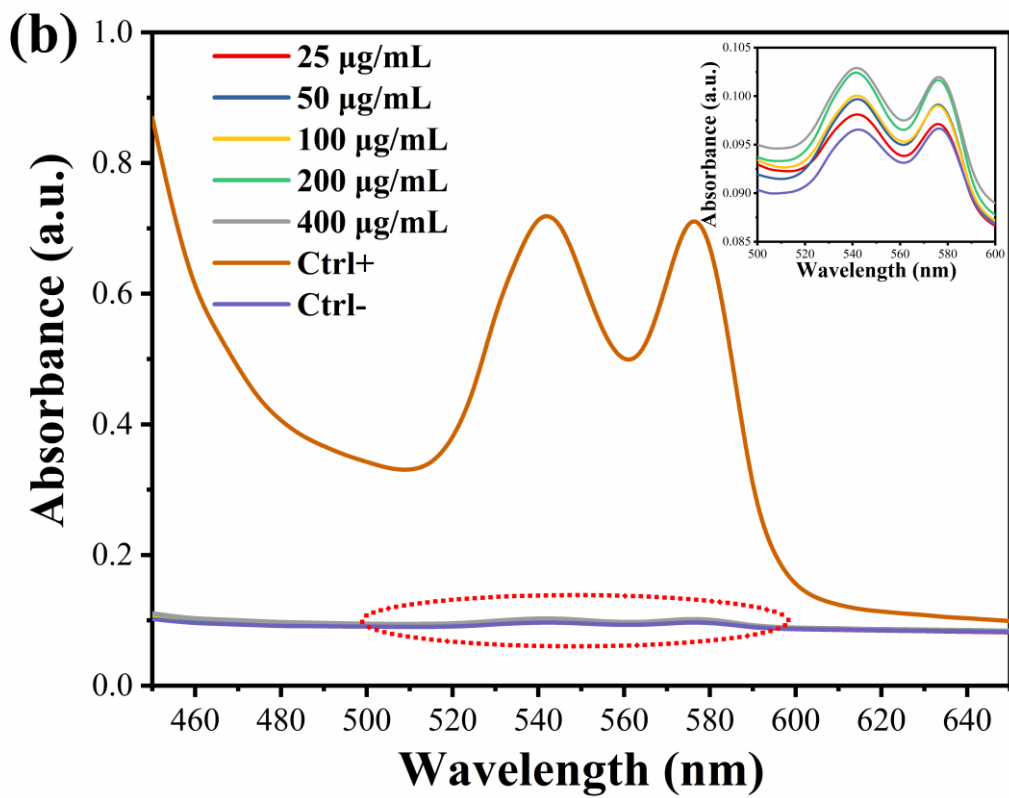

Figure S5. Hemolytic activity of (a) IO NPs and (b) IO-EDTMP NPs.



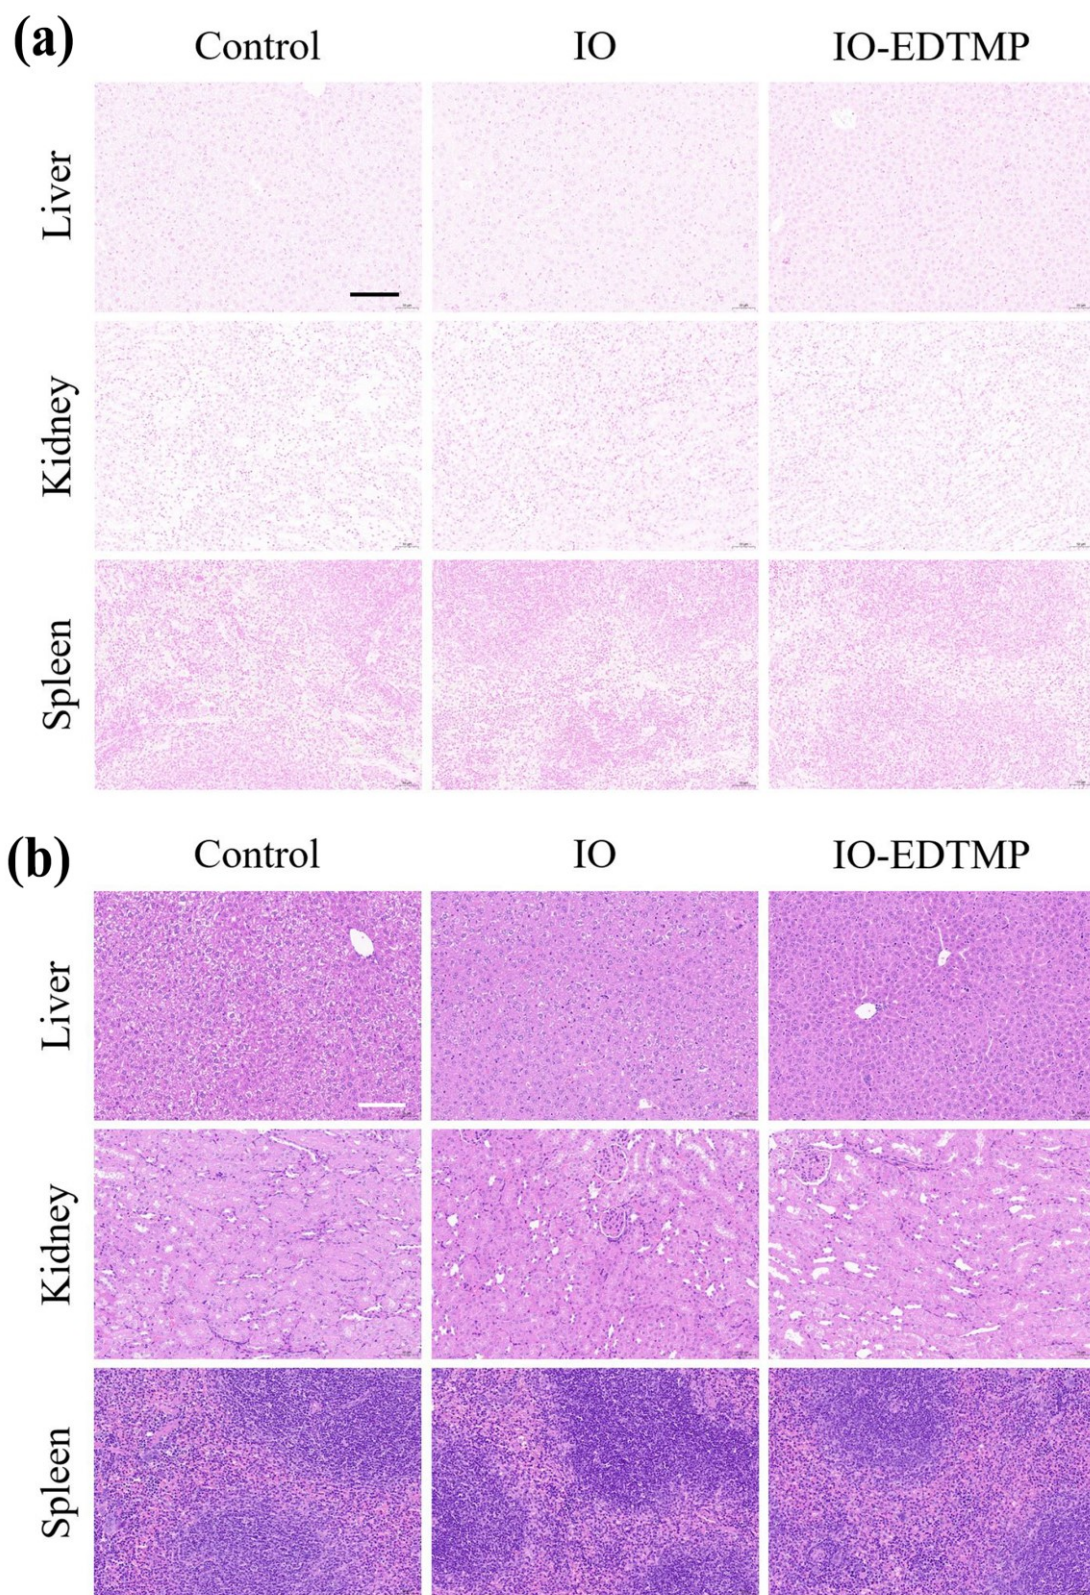

**Figure S6.** Histological evaluation of the liver, kidney and spleen excised from normal mice (control) and the mice suffered intravenous administration of IO and IO-EDTMP NPs. (a) Prussian Blue staining. (b) Hematoxylin and eosin staining. Scale bar: 100  $\mu$ m.



Table S1. Serum analysis of normal mice (control) and the mice suffered intravenous administration of IO and IO-EDTMP NPs

| Parameter               | Control (n = 4)  | IO (n = 4)       | IO-EDTMP (n = 4) |
|-------------------------|------------------|------------------|------------------|
|                         | mean $\pm$ SD    | mean $\pm$ SD    | mean $\pm$ SD    |
| Total protein, g/L      | 54.6 $\pm$ 1.4   | 48.5 $\pm$ 2.1   | 50.8 $\pm$ 1.1   |
| ALT, U/L                | 58.3 $\pm$ 16.2  | 104.3 $\pm$ 21.3 | 76.0 $\pm$ 15.4  |
| ALP, U/L                | 235.7 $\pm$ 33.9 | 320.8 $\pm$ 55.1 | 309.0 $\pm$ 32.2 |
| Urea mmol/L             | 6.5 $\pm$ 1.8    | 9.9 $\pm$ 0.5    | 8.5 $\pm$ 0.7    |
| Creatinine, $\mu$ mol/L | 37.7 $\pm$ 2.3   | 39.4 $\pm$ 2.1   | 41.5 $\pm$ 2.7   |
| Albumin, g/L            | 29.7 $\pm$ 1.3   | 27.9 $\pm$ 0.9   | 28.5 $\pm$ 0.4   |
| Iron, $\mu$ mol/L       | 41.48 $\pm$ 7.54 | 32.48 $\pm$ 4.74 | 40.98 $\pm$ 1.88 |

Abbreviations: ALT, alanine transaminase; ALP, alkaline phosphatase.

## References

- [1]. P. Wang, L. Hao, Z. Wang, Y. Wang, M. Guo, P. Zhang, *ACS Appl. Mater. Interfaces*, 2020, 12, 49464-49479.
